# **Prosodic categories in speech are acoustically multidimensional: evidence from dimension-based statistical learning**

Kyle Jasmin<sup>1\*</sup>, Adam Tierney<sup>1\*</sup>, and Lori Holt<sup>2</sup>

1. Birkbeck, University of London; 2. Carnegie Mellon University

Abstract | Segmental speech units (e.g. phonemes) are described as multidimensional categories wherein perception involves contributions from multiple acoustic input dimensions, and the relative perceptual weights of these dimensions respond dynamically to context. Can prosodic aspects of speech spanning multiple phonemes, syllables or words be characterized similarly? Here we investigated the relative contribution of two acoustic dimensions to word emphasis. Participants categorized instances of a two-word phrase pronounced with typical covariation of fundamental frequency (F0) and duration, and in the context of an artificial ‘accent’ in which F0 and duration covaried atypically. When categorizing ‘accented’ speech, listeners rapidly down-weighted the secondary dimension (duration) while continuing to rely on the primary dimension (F0). This clarifies two core theoretical questions: 1) prosodic categories are signalled by multiple input acoustic dimensions and 2) perceptual cue weights for prosodic categories dynamically adapt to local regularities of speech input.

Keywords: speech, prosody, dimension-based statistical learning, suprasegmental speech, perceptual cue weighting

\*equal contributions

Correspondence to:  
Kyle Jasmin  
[k.jasmin@bbk.ac.uk](mailto:k.jasmin@bbk.ac.uk)

## Highlights

- Prosodic categories are signalled by multiple acoustic dimensions.
- The influence of these dimensions flexibly adapts to changes in local speech input.
- This adaptive plasticity may help tune perception to atypical accented speech.
- Similar learning models may account for segmental and suprasegmental flexibility.

## Introduction

A central challenge in the study of speech communication is understanding how continuous variation across multiple acoustic dimensions is perceived as speech. There is broad empirical evidence that units of segmental speech such as phonemes are not signalled by any single acoustic dimension. Instead, units are conveyed by multiple acoustic dimensions that vary in their diagnosticity or ‘perceptual weight’ in signalling a speech category (Holt & Lotto, 2006; Toscano and McMurray 2010). For example, in clear speech, the phoneme /b/ (as in ‘bat’) is distinguished from /p/ (as in ‘pat’) in part by the time elapsed between the acoustic burst created by release of the articulators and the onset of the periodic signal associated with the vibration of the vocal folds, an interval referred to as the ‘voice onset time’ or VOT (Lisker 1957), which is longer for /p/ than /b/. Whereas VOT is most effective in signalling /b/–/p/ categorization in clear speech for English listeners, at least 16 other acoustic dimensions also contribute, such as the fundamental frequency (F0) at VOT offset and the length of delay in the onset of the first formant (Lisker 1986). Thus, multiple acoustic dimensions contribute to segmental speech categorization but the diagnosticity of these dimensions in signalling segmental speech categories varies; dimensions carry different *perceptual weight*.

Research has found that perceptual weights of acoustic dimensions are context-dependent and malleable according to short-term speech input regularities. For example, as we note above, VOT typically carries greater perceptual weight than F0 in signalling /b/ versus /p/ speech categories—in *clear speech*. However, in the presence of background noise, this pattern reverses, and F0 is more reliably associated with listeners’ categorization responses than VOT (Winn et al., 2013; Holt et al., 2018; Wu & Holt, under review). Perceptual weights of acoustic dimensions also rapidly shift in response to short-term changes in the distribution of acoustic

cues experienced in speech input. For example, in English, VOT and F0 typically covary such that longer VOT and higher F0 co-occur and signal /p/, whereas shorter VOT and lower F0 frequencies co-occur and signal /b/. When listeners are exposed to an artificial ‘accent’ for which the relationship between F0 and VOT is reversed (e.g. longer VOTs co-occurring with lower F0), they rapidly down-weight reliance on the secondary dimension such that F0 is no longer an effective signal of /b/ versus /p/ category membership (Idemaru & Holt, 2011; 2014; Zhang & Holt, 2018; Schertz et al., 2016; Lehet & Holt, 2017; Wu & Holt, under review). When the short-term input regularities return to English norms, the perceptual weight of F0 cues quickly returns to baseline levels such that it signals /b/ and /p/ differentially.

This rapid adaptation of how acoustic input dimensions contribute to segmental speech perception is referred to as ‘dimension-based statistical learning’ (Idemaru & Holt, 2011). Importantly, when co-occurrence statistics between two dimensions are reversed (e.g. to create the ‘accent’ described above), the primary dimension (i.e. the one that typically carries greater perceptual weight) continues to signal category membership unambiguously. For instance, since English listeners perceptually weight VOT more than F0 in clear speech, VOT continues to signal /b/-/p/ category membership even in the context of a reversal of the VOTxF0 correlation in short-term speech input that conveys an accent. Several lines of evidence (Idemaru & Holt, 2011; Zhang et al., in press; Wu & Holt, under review; Wu, 2020) demonstrate that activation of an existing linguistic representation is crucial to eliciting the dynamic re-weighting of secondary acoustic input dimensions, perhaps through supervised error-driven learning (Guediche et al., 2014; Wu, 2000) or, alternatively, reinforcement learning mechanisms (Harmon et al., 2019). In sum, there is substantial evidence that segmental speech perception involves contributions from

multiple acoustic dimensions, and that the relative perceptual weights of these contributions are dynamically adjusted according to listening context.

## **Acoustic Dimensions and Prosodic Categories**

It is not yet known whether this reliance on multiple acoustic dimensions and sensitivity to short-term regularities in speech input distributions extend beyond segmental perception to prosodic aspects of speech perception that span multiple phonemes, syllables, words or phrases such as lexical stress, tone, emphasis, and sentential intonation. In terms of the acoustics of speech, prosodic distinctions are correlated with multiple acoustic dimensions, as they are for segmental distinctions. For example, measurements of speech acoustics have shown that word emphasis is most strongly correlated with a sudden change in F0, but other acoustic dimensions such as duration and amplitude are also correlated to lesser degrees (Breen et al. 2010). However, whether these acoustic correlations are reflected in the representations of prosodic categories as different *perceptual* weights across acoustic dimensions has received little empirical scrutiny (but see Yang et al., 2014).

Prevailing linguistic theories of prosodic categories mainly focus on F0, or if other dimensions are considered, they are examined individually without assessing how they may interact with one another. For instance, a highly influential and F0-centred linguistic theory of suprasegmental categories, the Autosegmental-Metrical approach, describes an intonational phonology that consists of pitch accents associated with word prominence and edge tones associated with the boundaries of intermediate and intonational phrases (Pierrehumbert and Hirschberg 1990; Ladd 1996). Pitch accents and edge tones are defined as discrete suprasegmental F0 patterns that signal discrete phonological categories. In a competing theory,

PENTA (Xu and Xu 2005), communicative functions (focus, stress, newness, questions) are associated not with discrete F0 patterns, but with a variety of acoustic features such as F0, F0 range, articulatory strength and duration, as the realized output of the speech articulators trying to achieve certain hypothetical underlying pitch targets. What these two theories share is a central focus on F0: symbolic categories are defined in terms of either discrete acoustic F0 patterns or hypothetical F0-related articulatory targets. Although empirical evidence from eye tracking, for example (Watson et al. 2008a, Kurumada et al. 2014), does indicate that pitch accents serve communicative functions such as highlighting new or contrasting information, pitch accents also co-occur with other acoustic dimensions such as duration (Turk and Sawusch 1997, Turk and White 1999). The role of acoustic dimensions other than F0 in prosodic categories has been left somewhat ambiguous in these categorical theories: it is not clear whether such prosodic categories are exclusively signalled by F0, or whether they are associated with multiple acoustic dimensions, as in segmental speech.

Whereas these ‘categorical’ theories of linguistic prosody posit that F0 patterns serve discrete functions, what we will call ‘non-categorical’ theories of suprasegmental patterns in speech take other acoustic dimensions, beyond F0, into account. One such proposal is that the prominence of words reflects their redundancy and importance in a graded fashion relative to the preceding context (Aylett and Turk 2004, Watson 2010). Prominence can be tied to somewhat disparate acoustic effects: for example, predictability in discourse has been linked to shorter word duration and smaller pitch excursions, whereas importance has been linked to greater intensity (Watson et al. 2008b). According to these non-categorical theories, prosodic prominence is graded and reflects multiple acoustic and statistical factors driven by mechanisms such as production constraints and communicative intent. These non-categorical approaches,

therefore, suggest that, because different acoustic dimensions reflect different underlying causes (i.e. some reflecting communicative intent and others merely production constraints), listeners may track and interpret acoustic dimensions separately rather than integrate them into multi-dimensional categories.

Prior experimental psycholinguistic research has sought to investigate whether prosody is perceived as graded or discrete, and this work has focused mainly on F0. Two main methodologies have been used: categorical perception and imitation. In the classic categorical perception paradigm, participants are given two main tasks. First, they are presented with stimuli drawn from a series that varies along some acoustic dimension and asked to categorize a single item as one of two alternatives. Then, they are asked to judge whether two adjacent items on the series are the same or different. A peak in the discrimination function in the second task that aligns with the steepest portion of the categorization function in the first task (i.e. the categorization boundary) is taken as evidence for categorical perception. Attempts to apply the categorical perception approach to investigate the existence of suprasegmental categories have yielded mixed results. Evidence for categorical perception has been reported for F0 peak alignment (Kohler 1987) and high versus low boundary tones (Remijsen and van Heuven 1999, Schneider and Lintfert 2003, Saindon et al. 2017). However, other papers reported finding no discrimination peak for high versus low boundary tones (Falé and Faria 2006) or emphatic (vs. neutral) accents (Ladd and Morton 1997). Whereas the above-mentioned papers manipulated only F0, Kimball & Cole (2020) manipulated the extent to which both F0 and duration implied the existence of an accent on an earlier versus later word in a phrase, and then compared the degree of categorical perception to that found for a fricative contrast. Although a discrimination

peak was clearly present for fricative perception, there was no evidence for a discrimination peak for accent perception.

In imitation paradigms, listeners are presented with speech featuring F0 patterns from an acoustic continuum spanning two purported prosodic categories and are asked to repeat them. If prosodic information is represented categorically, then within-category changes across the acoustic continuum should be minimized or absent in imitation. Results from imitation paradigms have largely supported the existence of pitch-based prosodic categories, with clear evidence for minimized within-category differences in imitation of F0 peak alignment (Pierrehumbert and Steele 1989, Zárata-Sández 2016) and high versus low boundary tones (Braun et al. 2006). However, other studies have demonstrated graded imitations of stimuli differing in type of pitch accent (Dilley 2010) and provided evidence that while one pitch-based cue (accent downstep) is perceived categorically, several others (duration, peak height, and peak alignment) are perceived as gradients (Baumann et al. 2006). Thus, although there is somewhat mixed evidence for categorical representations in prosodic speech perception, the available evidence has come from studies that have focused almost exclusively on F0.

To summarize, two key theoretical issues regarding suprasegmental speech perception remain unresolved: 1) Is suprasegmental information represented categorically? 2) Do multiple acoustic dimensions contribute to prosodic speech perception? Here we investigate both of these issues using dimension-based statistical learning.



# Dimension-Based Statistical Learning and Suprasegmental

## Categories

There is rich evidence that segmental speech is represented as categories (Holt & Lotto, 2008) reliant on multiple acoustic input dimensions that contribute to perception with different weights (Toscano & McMurray, 2010). However, there is sparse evidence addressing the question of whether multiple acoustic dimensions signal prosodic distinctions like word emphasis, and if so, whether those dimensions carry different ‘perceptual weight’ in their effectiveness in signalling suprasegmental categories, and whether this effectiveness is modulated by short-term speech input regularities (co-occurrence patterns of acoustic dimensions), as it is in segmental speech perception. The present study aims to address this gap by using a paradigm that has had utility in segmental speech perception.

As described above, for segmental speech perception the impact of a specific acoustic input dimension on perception is affected by the short-term input regularities that listeners encounter. Upon hearing an ‘accent’ that reverses the typical relationship between two acoustic dimensions associated with a segmental category, listeners tend to down-weight reliance on the secondary (less diagnostic) dimension (Idemaru and Holt 2011). An account in which suprasegmental categories are represented as multidimensional would predict that disrupting the canonical co-occurrence pattern of acoustic dimensions should cause listeners to down-weight secondary dimensions in signalling suprasegmental category identity. In the case of emphasis (‘STUDY music’ vs. ‘study MUSIC’), where F0 is the primary dimension, we expect listeners to down-weight duration (a secondary dimension; Breen et al. 2010). In indirect support of this possibility, prior research demonstrates that exposure to a speaker with idiosyncratic/unreliable use of pitch accents leads listeners to down-weight intonation as a cue to speaker intent (Roettger

and Franke 2019, Roettger and Rimland 2020). Moreover, when ambiguous pitch contours are consistently paired with a particular interpretation, categorization functions shift according to whether a statement had a positive or a negative interpretation (Kurumada et al. 2018).

Here, we presented participants with spoken phrases drawn from a two-dimensional stimulus space in which stimuli varied in the extent to which F0 contours and duration patterns implied emphasis on one of two words. In the Canonical condition, F0 and duration cues co-occurred in a manner typical of English, whereas in the Accented condition, F0 and duration cues were presented with an ‘accent’ that reversed the canonical co-occurrence patterns of English. In each condition, a minority of trials were test stimuli for which F0 contour was constant and perceptually ambiguous and duration varied to signal emphasis on one word or another. If the mapping of acoustic input dimensions in prosodic speech perception is sensitive to multidimensional acoustic input dimensions, and the perceptual weight of these dimensions is flexibly adjusted according to short-term speech input regularities, then we predict that the test stimuli varying in duration will differentially signal word emphasis in the Canonical condition, and be down-weighted to have less influence on suprasegmental judgments in the Accented condition. Such a pattern would suggest that although F0 is the primary, heavily perceptually weighted, acoustic dimension signalling word emphasis, both F0 and duration contribute to prosodic speech perception. Furthermore, it would imply that there exist internal category representations for the prosodic word emphasis, and that the contribution of acoustic input dimensions to suprasegmental speech categorization is dynamically and flexibly adjusted according to input regularities.

## Methods

### Participants

Native speakers of American English ( $N = 43$ , 37 F; aged 18–22 years) with normal hearing were recruited from Carnegie Mellon University. Participants took part for university credit or payment after giving informed consent. The study was approved by the Carnegie Mellon University Institutional Review Board in line with the Declaration of Helsinki. Based on robust behavioral effects from prior studies of dimension-based statistical learning for segmental speech (e.g., Idemaru & Holt, 2011; Liu & Holt, 2015) which yielded very large effect sizes (e.g. Cohen’s  $d = 1.7$  for the analogous interaction effect in a similar study from Liu & Holt, 2015), we estimated that a minimum of 21 participants would be required to detect an effect with predicted power of 99% (conducted using ‘pwr’ package in R, two-tailed alpha at 0.05). However, because dimension-based statistical learning paradigms had not been used previously to examine a suprasegmental contrast, final sample size was determined by collecting the maximum number of participants that could be recruited and tested given time and resource constraints.

### Stimulus Creation

The stimulus space was defined by orthogonal acoustic manipulations across duration and F0 contour over tokens of the spoken English phrase “study music.” The tokens were created by recording the voice of a native English speaker saying the phrases “Dave likes to STUDY music” (early focus) and “Dave likes to study MUSIC” (late focus), with emphasis placed either

on STUDY, or MUSIC. The two recordings were then ‘morphed’ together using STRAIGHT software (Kawahara & Irino, 2005; Jasmin et al., 2020a, b, c): the F0 was extracted from voiced segments of the two utterances; next, aperiodic aspects of the signal were identified and analyzed; then, the filter characteristics of the signal were calculated. Finally, the two “morphing substrates” (speech from each recording decomposed into F0, aperiodic aspects, and filter characteristics) were manually time aligned by marking corresponding ‘anchor points’ in both recordings. This was done by examining a similarity matrix generated by STRAIGHT (based on the two input sound files) and manually marking corresponding salient changes in the spectrograms.

Following temporal alignment, STRAIGHT’s morphing procedure involves regenerating a signal using a linear interpolation between the manually-marked anchor points in an abstract distance space (Kawahara & Irino, 2005). For F0 this is in the log–frequency domain. In creating these morphed versions, the F0 contour and durational morphing rates were adjusted orthogonally in order to create a 7-by-7 grid of stimuli whose F0 and durational properties cued emphasis on STUDY or on MUSIC to 7 different degrees: 0%, 17%, 33%, 50%, 67%, 83%, and 100%, with 0% indicating that the F0 contour or duration characteristics came from the “STUDY music” recording, 100% meaning F0 and duration were identical to the “study MUSIC” recording, and intermediate values indicating F0 and duration patterns linearly interpolated between the two original recordings. Finally, the stimuli were trimmed to only contain the two words “study” and “music.” Following morphing, the differences in F0 between study and music, measured at the nucleus of the first vowel of each word, at each of the seven F0 levels were –8.5, –5.0, –2.1, +0.6, +3.4 +5.7, and +8.1 semitones, negative values reflecting higher frequency F0 on “music” than “study”. (These steps were not exactly evenly spaced as they

reflect the difference in measurements between the two words for F0.) The differences in duration between the first (stressed) syllables of ‘study’ and ‘music’ (measured as the onset and vowel, ‘stuh’ and ‘myoo’) in the final morphed stimuli were approximately 220, 150, 110, 90, 70, 50, and 40, milliseconds. The boundary between syllables was defined by visually inspecting the spectrogram and marking the offset of voicing before the /d/ in ‘study’ and the onset of high frequency fricative information in ‘music’.

## Baseline Stimuli

Figure 1 illustrates how stimuli were sampled from this 7-by-7 stimulus space across blocks. Baseline stimuli consisted of 25 versions of the spoken phrase “study music” with word emphasis manipulated across F0 contour and duration. A 5-by-5 subset from the center of the 7-by-7 stimulus space (grey in Figure 1) sampled the two acoustic dimensions orthogonally to establish listeners’ baseline perceptual weights in labeling the speech as having early versus late word emphasis (*STUDY music* versus *study MUSIC*).

## Exposure Stimuli

In subsequent blocks, stimuli were sampled from the 7-by-7 stimulus space to manipulate short-term speech input regularities across a Canonical block that mirrored English acoustic regularities (orange squares, Figure 1) and an Accented block that reversed the typical correlation between F0 contour and duration to create an artificial ‘accent’ (orange squares, Figure 1). Exposure stimuli comprised 80% of trials in these blocks.

## Test Stimuli

Test stimuli (blue squares, Figure 1) made up the remaining 20% of stimuli within the Canonical and Accented blocks. Test stimuli were constant across blocks and served to assess the degree to which listeners make use of duration to signal word emphasis as a function of the short-term regularities conveyed by the Exposure stimuli that vary across blocks. Test stimuli possessed acoustically ambiguous F0 Contour (level 50%) and distinct duration (level 33%, level 67%). Test stimuli were randomly interspersed with Exposure stimuli in the Canonical and Accented blocks.

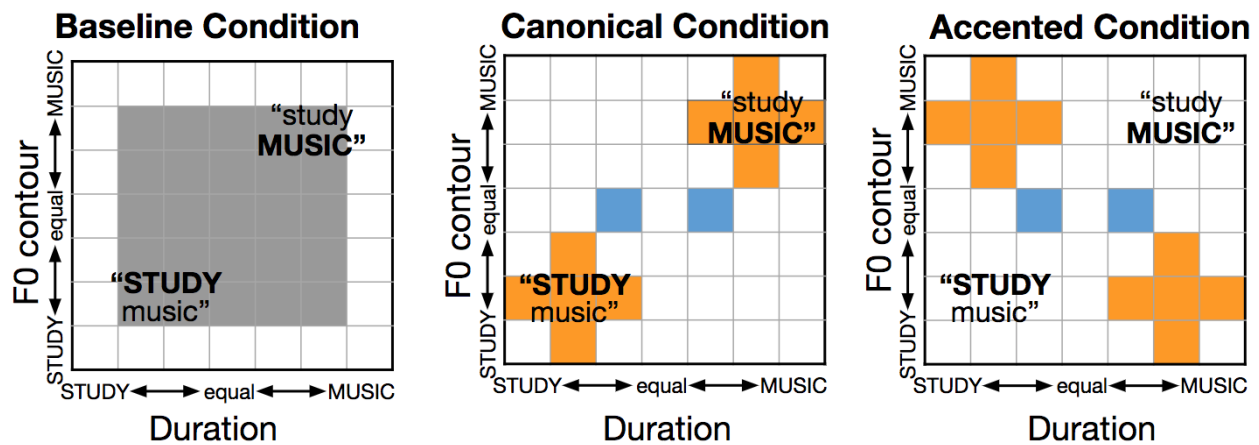

**Figure 1. Stimuli.** Stimuli sampled a 7-by-7 acoustic space across duration and F0 contour. Baseline categorization measurements made use of the center 25 stimuli in the grid (left panel), sampled orthogonally across dimensions. During the Canonical Block (middle panel), participants categorized canonical-exposure stimuli (orange squares). During accented exposure (right panel), participants categorized stimuli for which F0 and duration cues possessed a correlation opposite that of English (orange squares). Participants also categorized Test stimuli, which had identical F0 contours and distinct durations (blue squares).

## Procedure

Participants were seated in front of a computer monitor in a sound-attenuated booth. Each trial began with a looming checkerboard circle in the center of the monitor. When participants had fixated on the checkerboard for one second, a stimulus phrase “study music” (Fig. 1) was presented diotically over headphones (Beyer DT-150) and then the response options appeared on the screen. Participants were instructed to press either the ‘z’ or ‘m’ key on the keyboard, associated with the spatial position of the response labels, to indicate whether they heard “STUDY music” or “study MUSIC.” The key press triggered the next trial.

Participants experienced the Baseline, Canonical and Accented conditions as three blocks, always presented in the same order. All that differed across blocks was the sampling of stimuli. The task remained constant. Trials were presented across blocks without breaks or any other overt demarcation so that block structure was implicit and unknown to participants. The Baseline block consisted of 200 trials (25 stimuli  $\times$  8 presentations; grey in Figure 1), the Canonical block consisted of 80 Canonical exposure trials (10 stimuli with 8 presentations; orange, Figure 1, middle panel) and 16 interspersed Test trials (2 stimuli with 8 presentations; blue, Figure 1), and the Accented block consisted of 80 Accented exposure trials (orange, Figure 1, right panel) and 16 interspersed test trials (blue, Figure 1). The entire session was completed in approximately 25 minutes. The experiment was delivered under the control of E-prime experiment software (Psychology Software Tools, Inc.).

## Analyses

F0 contour and duration perceptual weights for the baseline trials were calculated by estimating a logistic regression for each subject, with F0 level (2 to 6) and duration level (2 to 6) predicting

the binary response (*STUDY music* vs *study MUSIC*). The coefficients for F0 contour and duration were then combined by normalizing them such that they summed to one (Holt & Lotto 2006; Idemaru et al., 2012; Jasmin et al., 2020a), resulting in a normalized perceptual weight that ranged between 0 and 1, with values closer to 1 indicating greater reliance on F0 contour than duration, values closer to 0 indicating the reverse, and 0.5 indicating equal reliance. The mean normalized perceptual weights were compared across subjects against a value of 0.5 with a one sample t-test.

Performance on the exposure trials in the Canonical and Accented blocks were assessed for accuracy as proportion correct (defined according to the ‘dominant,’ heavily perceptually weighted, dimension from the baseline weights). To analyze effects of Canonical and Accented exposure on categorization of test stimuli, the trial-wise data for all participants was entered into a mixed effects logistic regression using *lme4*’s *glmer* function (Bates et al., 2015) with ‘family=binomial’, and Response (*STUDY music* vs *study MUSIC*) predicted by the Exposure Type (Canonical vs Accented), duration (longer *STUDY* vs longer *MUSIC*), and their interaction, as well as Participant as a random intercept in R. The effect of the interaction term was calculated by comparing this full model to a null model (without the interaction) using R’s *anova* function. Pairwise tests were conducted with *lsmeans* in R (Russell & Length, 2016).

## Results

### Baseline Categorization

Figure 2 illustrates average categorization responses for the Baseline block in which F0 contour and duration varied orthogonally across stimuli. Participants tended to rely more on F0 contour



than duration to categorize the spoken phrase according to word emphasis, replicating the results of Jasmin et al. (2020a), and confirming that F0 contour is a stronger cue to word emphasis than duration (normalized perceptual cue weight  $M_{F0} = 0.81 \pm 0.03$ ,  $t(42) = 10.62$ ,  $p < 0.001$ ; higher values indicate greater F0 contour reliance).

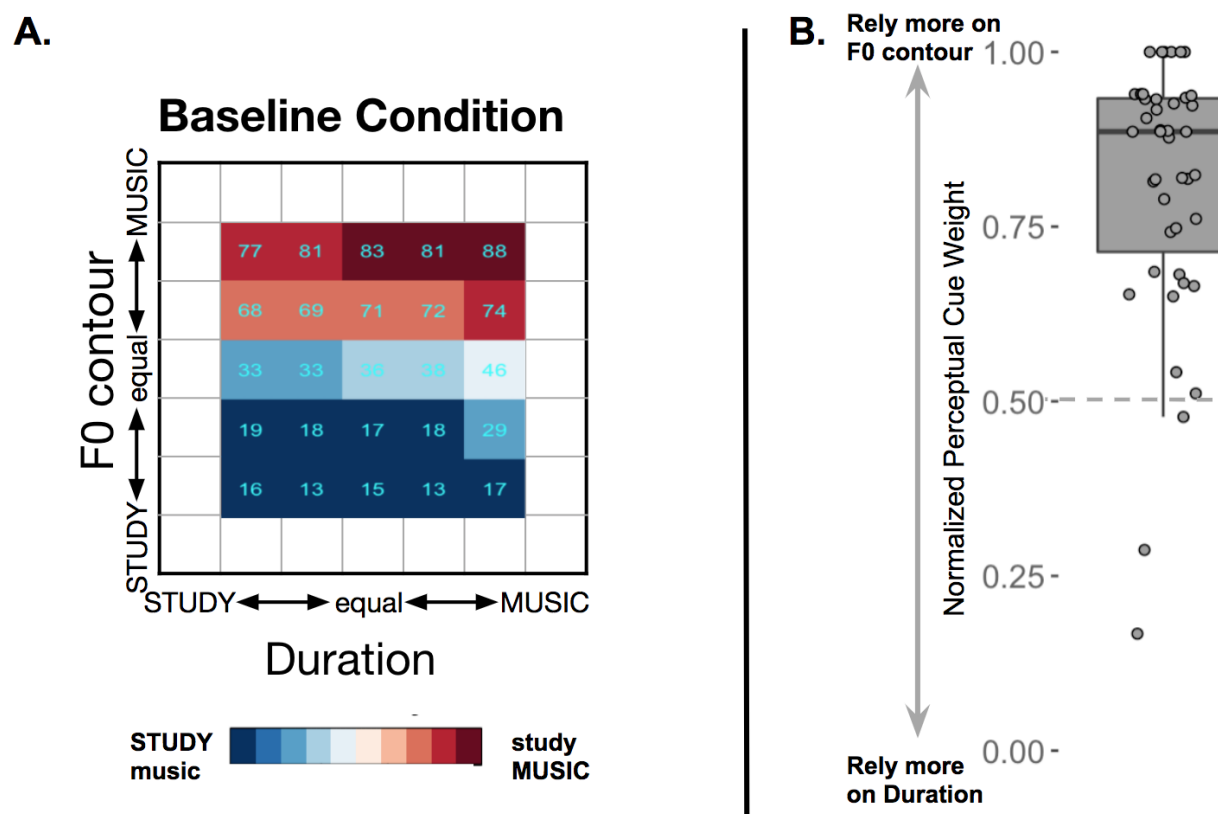

**Figure 2. Results from the Baseline Condition.** **A)** Mean percent categorization responses for each of the baseline stimuli. Blue indicates that participants tended to perceive emphasis as “*STUDY music*” whereas red indicates that they perceived emphasis as “*study MUSIC*”. **B)** Normalized perceptual weights for each participant. Most participants relied more on the F0 contour dimension than the duration dimension to judge emphasis.

## Categorization of Exposure Stimuli

Responses to the unambiguous exposure stimuli were examined to ensure that participants were using F0 (the primary dimension signalling word emphasis) to make their judgments in the Canonical and Accented blocks (orange squares in Fig.1). The mean percentage of correct responses, defined according to F0 contour, was high during the Canonical block ( $M = 88.1 \pm 12.1$ ) as well as during the Accented block ( $M = 81.9 \pm 0.17.2$ ).

## Categorization of Test Stimuli

Test stimuli served as the primary measure of whether short-term speech input regularities impact perception of word emphasis. Recall that test stimuli possessed an acoustically ambiguous F0 contour, thereby neutralizing the acoustic dimension most listeners rely upon to make word emphasis judgements (Figure 2). Thus, categorization of Test stimuli provides a measure of the extent to which listeners are able to rely on duration to judge word emphasis, and whether the perceptual weight of duration is modulated across manipulations in short-term speech regularities experienced across Exposure stimuli in the Canonical and Accented blocks. Figure 3 illustrates these results.

As predicted, categorization of the test trials differed as a function of the short-term speech input regularities experienced across the Canonical and Accented blocks (comparison of the full model including interaction of Block and Test Stimulus Duration term with null model omitting the interaction  $\chi^2(1, 5) = 4.27, p = 0.039$ ). Pairwise post-hoc tests indicated that in the context of Canonical short-term regularities in speech input conveyed by the exposure trials, duration influenced categorization when F0 contour was ambiguous, with longer word duration indicating emphasis (OR = 1.95, Cohen's  $d = 0.37, Z = 3.90, p < .001$ ). However, upon

introduction of the artificial ‘accent’ that reversed the relationship between F0 contour and duration relative to canonical English patterns, listeners’ reliance on duration to signal word emphasis rapidly shifted. In the context of exposure to the Accented short-term regularity conveyed by exposure trials the perceptual weight of durational information dramatically decreased, to the point that there was no significant difference in participants’ word emphasis judgements as a function of duration ( $OR = 1.19$ , Cohen’s  $d = 0.10$ ,  $Z = 1.02$ ,  $p = 0.31$ ).

Previous studies of dimension-based statistical learning of segmental speech have found that the degree of re-weighting is positively correlated with Exposure stimulus categorization accuracy according to the dominant, heavily perceptually weighted acoustic dimension during the Accented block (Wu & Holt, under review; Wu, 2020). Degree of re-weighting was calculated by taking the difference in mean responses between the two test stimuli during the Accented condition. We then tested for correlations between degree of re-weighting and Accented condition exposure trial accuracy in the present data but no significant relationship was found ( $r(42) = .15$ ,  $p = .35$ ), nor was there a significant correlation between degree of re-weighting and normalized F0 cue weight at baseline ( $r(42) = -.04$ ,  $p = .80$ ).

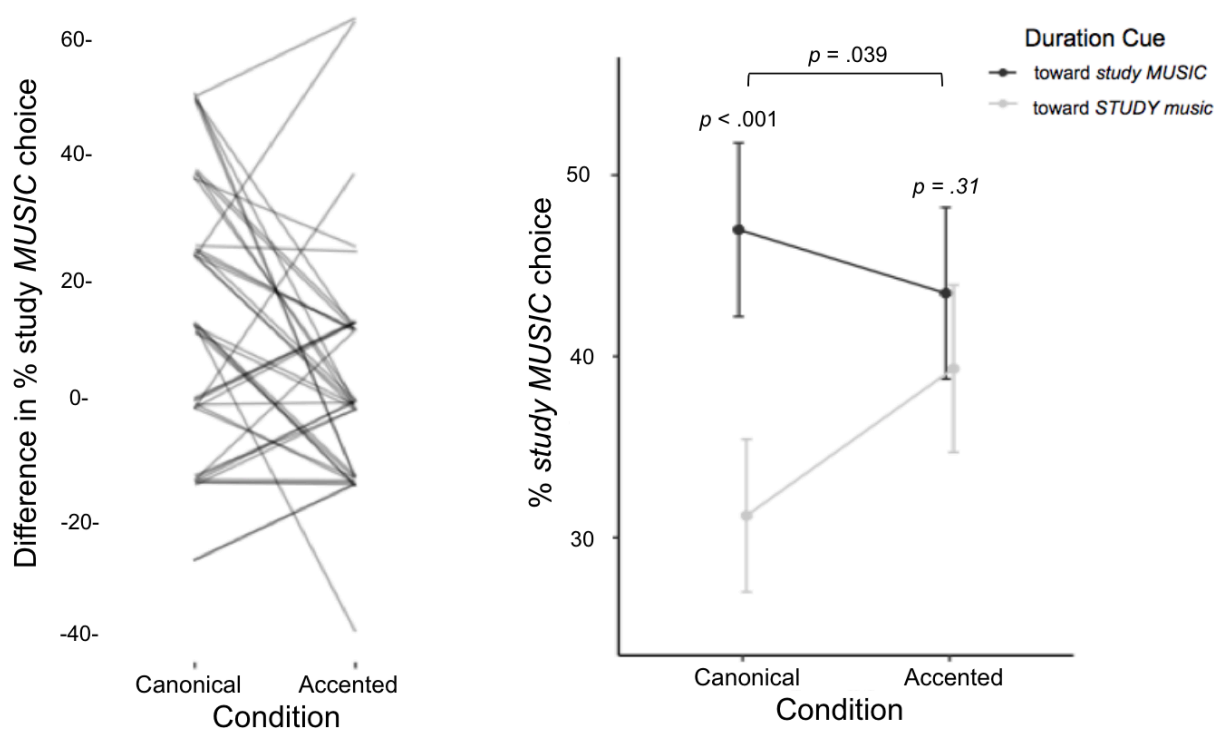

**Figure 3: Test Stimulus Categorization in the context of Canonical and Reversed Regularities.** Suprasegmental categorization behavior in the context of exposure to Canonical and Accented statistical co-occurrence of F0 contour and duration dimensions. When short-term regularity aligned with long-term English regularities in the Canonical block, duration differentially signalled word emphasis as *STUDY music* versus *study MUSIC*. Nonetheless, categorization of the same stimuli differed when short-term regularities departed from English in the Accented block; participants no longer relied upon the duration dimension in word emphasis judgments. The left panel shows subject-level data: the difference in percent of *study MUSIC* responses across the test trials for the Canonical versus Accented blocks. The right panel shows the mean percentage of responses categorized as *study MUSIC* for each test stimulus individually, and standard errors. Inferential statistics are the results of the mixed model analysis reported in the main text.

## General Discussion

Theories of suprasegmental phonology have posited an intimate link between prosodic categories and F0 (Autosegmental-Metrical approach, Pierrehumbert and Hirschberg 1990; PENTA, Xu and Xu 2005), and considered the mapping from acoustics to prosodic categories to be largely unidimensional. Here, we presented evidence that categorization of the suprasegmental feature word emphasis involves integration of evidence from multiple acoustic dimensions. First, we found that both F0 and durational patterns contribute to listeners' decisions regarding which of two words is accented (replicating Jasmin et al., 2020a). Second, more importantly, we found that when listeners are exposed to an artificial 'accent' in which the typical co-occurrence of F0 contour and duration is reversed, the perceptual weight of duration in signalling word emphasis sharply decreased, despite duration having robustly informed word emphasis categorization when the short-term relationship between F0 contour and duration mimicked typical English regularities. This is consistent with an account in which activation of multidimensional suprasegmental categories generates expectations about patterns of acoustic dimension variation typical of input, and drives error-driven supervised adjustment of the effectiveness of input dimensions in subsequently signalling categories (Idemaru & Holt, 2011; Guediche et al., 2014; Wu & Holt, under review). This rapid adaptive plasticity may tune suprasegmental perception in response to prosodic variation across speakers, given that use of prosodic features can vary even across native speakers (Peppé et al., 2000).

If suprasegmental categories are multidimensional, then the relative primacy of F0 versus other cues such as duration may reflect the informativeness of F0 in the extent of overlap in the distribution of cues associated with different categories (Holt & Lotto, 2006; Toscano and McMurray 2010) over long-term language experience, rather than any intrinsic link between F0

and suprasegmental features. If this were true, the primacy of F0 may not be universal and relative dimensional weighting may vary as a function of experienced distributional patterns of speech. It is also possible that the relative primacy of F0 may indicate that F0 is more robustly available to the perceptual system, for example as a result of auditory encoding or as a function of better surviving environmental or internal, neural, noise (Holt & Lotto, 2006). For example, individuals with congenital amusia, who have difficulty perceiving and remembering pitch in both musical and speech stimuli, weight F0 and duration roughly equally in a word emphasis categorization task like the one studied here (Jasmin et al., 2020a). It remains to be seen whether this link between the robustness of a perceptual dimension and the perceptual weight assigned to it is characteristic only of this special population, or whether it extends to the general population.

Future work could also investigate whether suprasegmental dimensional weighting reflects the relative usefulness of different cues in particular listening environments, or as a function of task (Holt & Lotto, 2006). For example, prior work in segmental perception shows that weighting of an F0-based cue to voicing (the F0 of the vowel following the consonant) is increased when speech is presented in masking noise, while the duration-based cue (VOT) is down-weighted (Winn et al., 2013; Holt et al., 2018; Wu & Holt, under review). Similarly, distinct contexts and task demands are likely to impact the relative effectiveness of multidimensional acoustic information signaling suprasegmental categories, as they do for segmental categories.

We have presented evidence that word emphasis is linked to the existence of multi-dimensional categories, but it remains to be seen whether this conclusion can be extended to other suprasegmental categories, as well. For example, although the Autosegmental-Metrical Approach links intonational phrase boundaries to pitch movements (i.e. edge tones), intonational

boundaries are also linked to additional cues in other acoustic dimensions, such as increased lengthening of the syllable just before the boundary and increased pause duration (Choi et al. 2005, Cumming 2010). Prior research has shown that listeners integrate information across dimensions when interpreting the location of an intonational boundary (Streeter 1978, Beach 1991, de Pijper and Sanderman 1994), suggesting that syntactic boundaries may be linked to multi-dimensional categories as well. Even lexical tones in tonal languages may be linked to somewhat multidimensional perceptual categories. For example, although pitch is the acoustic dimension which best distinguishes between the four lexical tones of Mandarin, there exist cues in other dimensions such as amplitude and duration that can be used to distinguish between tones when pitch information is unavailable, as in whispered speech (Lin and Repp 1989, Blicher, Diehl & Cohen 1990, Whalen and Xu 1992, Fu and Zeng 2000, Liu and Samuel 2004; Zhang et al., under review). We predict, therefore, that creation of an artificial accent in which pitch versus durational information supported contrasting lexical tone interpretations would lead to short-term decreases in durational weighting that parallel those reported in the current paper.

Here, the rapid adaptive plasticity we observed for the re-weighting of how effectively an acoustic dimension signals a suprasegmental category happened in a particular context – ‘accented’ speech for which F0 and duration cues were opposite of the typical covariation pattern for one particular spoken token (“study music”) and one single speaker. It is unknown whether this learning might generalize to other suprasegmental categories, other specific examples of word emphasis, or other speech from other talkers. Research on dimension-based statistical learning like that observed here has observed that some generalization takes place, but to different extents depending on speaker and linguistic contexts (Idemaru & Holt, 2014; Liu & Holt, 2015; Zhang and Holt, 2018; Lehet and Holt, 2020). For segmental speech perception, it

has been shown that learning of an artificial accent does indeed generalize across linguistic contexts (e.g., to lists of words/nonwords (Idemaru and Holt, 2020; Lehet and Holt, 2020) and across voices (Liu & Holt, 2015) but the degree of down-weighting tends to be lesser in contexts not directly experienced by listeners. There is also evidence that speaker information cued vocally or visually can be used to guide speaker-specific dimension-based statistical learning of phonetic categories (Zhang and Holt, 2018). Listeners have also been shown to downweight acoustic dimensions that are used unreliably for a prosodic contrast by a particular speaker — specifically for that speaker (Roettger & Rimland, 2020). Though there remain many open questions even for adaptive plasticity across segmental speech categorization, in general patterns of generalization seem to be consistent with an account that category activation drives reweighting. To the extent that short-term input regularities across acoustic dimensions are effective in activating a suprasegmental category even as they deviate from long-term expectations of correlations among input dimensions, we would anticipate re-weighting and modest generalization. In fact, as has been the case in studies of segmental categories (Idemaru and Holt, 2014), successes and failures of the generalization of dimension-based statistical learning can inform the nature of underlying category representations. The present results suggest such an approach may be fruitfully applied in suprasegmental research.

Our results suggest that dimensional weighting in suprasegmental speech perception is a dynamic process, in that relative weighting can change over the time scale of just a few minutes. What neural mechanism might make possible these rapid changes in how perceptual information is integrated? One possibility is that short-term modulations in neural functional connectivity between perceptual regions devoted to the processing of a given acoustic dimension and regions connected to language processing drive changes in dimensional weighting. Changes in functional



connectivity have been linked to short-term changes in perceptual integration strategies in other domains. For example, changes in relative weighting of auditory versus visual information regarding spatial location of signal sources has been linked to connectivity between unimodal perceptual areas and the intraparietal sulcus (Rohe and Noppeney 2018). Similarly, during audiovisual speech perception, connectivity between auditory cortex and the superior temporal sulcus (STS) increases when the auditory modality is more reliable, while connectivity between visual cortex and the STS increases as a function of the reliability of the visual signal (Nath and Beauchamp 2011). We recently presented evidence suggesting that functional connectivity patterns may underlie relative perceptual weighting of acoustic dimensions during suprasegmental speech perception as well (Jasmin et al. 2020d). We found that, when participants underwent fMRI scanning while performing an intonational phrase boundary perception task, connectivity between pitch-sensitive areas in the insula and superior temporal gyrus and left prefrontal language-related regions was weakened in participants with amusia, who down-weighted pitch information during suprasegmental categorization, relative to control participants. This connectivity pattern, however, could reflect intrinsic differences between amusics and controls rather than perceptual weighting. The hypothesis that dimensional weighting is linked to changes in functional connectivity could be more stringently tested using the suprasegmental dimensional weighting shift paradigm presented in the current paper, by inducing shifts in cue weighting driven by contextual changes in the correlations between dimensions and examining the effects on functional connectivity.

It is possible that dimension-based statistical learning of prosodic categories may extend to production. In a study on segmental speech, exposure to reverse ('accented') correlations between F0 and VOT not only led to a down-weighting of the secondary dimensions in

perception, but a weakened association between the secondary dimension and category membership in speech productions (Lehet & Holt, 2017). Further work could investigate whether the downweighting of duration observed here during prosody perception also manifests in speech production acoustics, which would suggest that prosodic categories activated during perception are shared with production.

In conclusion, we find that dimensional weights in prosodic speech perception are signalled by multiple acoustic dimensions whose perceptual weights are not flexible rather than fixed: they rapidly change in response to alterations in the distributional characteristics of dimensional cues in the input. This suggests that prosodic speech perception involves combining information from multiple sources to perceive multidimensional prosodic categories.

## **Competing Interests**

The authors declare no competing interests.

## **Acknowledgments**

We would like to thank Christi Gomez and Chisom Obasih for their role in collecting the data.

Funding: The work was funded by a Leverhulme Trust Research Project Grant (RPG-2019-107) to A, a Leverhulme Trust Early Career Fellowship (ECF-2017-151) to KJ, and support from the National Institutes of Health (R01DC017734) to LH.

## References

- Aylett, M., & Turk, A. (2004). The smooth signal redundancy hypothesis: A functional explanation for relationships between redundancy, prosodic prominence, and duration in spontaneous speech. *Language and speech*, 47(1), 31-56.
- Bates D, Mächler M, Bolker B, Walker S (2015). “Fitting Linear Mixed-Effects Models Using lme4.” *Journal of Statistical Software*, 67(1), 1–48. doi: 10.18637/jss.v067.i01.
- Baumann, S., Grice, M., & Steindamm, S. (2006, May). Prosodic marking of focus domains-categorical or gradient. In *Proceedings of speech prosody* (pp. 301-304).
- Beach C (1991) The interpretation of prosodic patterns at points of syntactic structure ambiguity: evidence for cue trading relations. *Journal of Memory and Language* 30, 644-663.
- Blicher, D. L., Diehl, R. L., & Cohen, L. B. (1990). Effects of syllable duration on the perception of the Mandarin Tone 2/Tone 3 distinction: Evidence of auditory enhancement. *Journal of Phonetics*, 18(1), 37-49.
- Braun, B., Kochanski, G., Grabe, E., & Rosner, B. S. (2006). Evidence for attractors in English intonation. *The Journal of the Acoustical Society of America*, 119(6), 4006-4015.
- Breen, M., Fedorenko, E., Wagner, M., & Gibson, E. (2010). Acoustic correlates of information structure. *Language and cognitive processes*, 25(7-9), 1044-1098.
- Choi J, Hasegawa-Johnson M, Cole J (2005) Finding intonational boundaries using acoustic cues related to the voice source. *JASA* 118, 2579-2587.

Cole, J., Mo, Y., & Hasegawa-Johnson, M. (2010). Signal-based and expectation-based factors in the perception of prosodic prominence. *Laboratory Phonology*, 1(2), 425-452.

Cumming, R. E. (2010). The interdependence of tonal and durational cues in the perception of rhythmic groups. *Phonetica*, 67(4), 219-242.

De Pijper, J. R., & Sanderman, A. A. (1994). On the perceptual strength of prosodic boundaries and its relation to suprasegmental cues. *The Journal of the Acoustical Society of America*, 96(4), 2037-2047.

Dilley, L. C. (2010). Pitch range variation in English tonal contrasts: Continuous or categorical?. *Phonetica*, 67(1-2), 63-81.

Falé, I., & Faria, I. H. (2006, May). Categorical perception of intonational contrasts in European Portuguese. In *Proceedings of Speech Prosody* (pp. 69-72). Dresden, Germany: TUDpress Verlag der Wissenschaften GmbH.

Fu, Q. J., & Zeng, F. G. (2000). Identification of temporal envelope cues in Chinese tone recognition. *Asia Pacific Journal of Speech, Language and Hearing*, 5(1), 45-57.

Guediche, S., Blumstein, S., Fiez, J., & Holt, L. L. (2014). Speech perception under adverse conditions: insights from behavioral, computational, and neuroscience research. *Frontiers in Systems Neuroscience*, 7, 126.

Harmon, Z., Idemaru, K., & Kapatsinski, V. (2019). [Learning mechanisms in cue reweighting](#). *Cognition*, 189, 76-88.

Holt, L. L., & Lotto, A. J. (2006). Cue weighting in auditory categorization: Implications for first and second language acquisition. *The Journal of the Acoustical Society of America*, 119(5), 3059-3071.

Holt, L. L., & Lotto, A. J. (2008). Speech perception within an auditory cognitive science framework. *Current directions in psychological science*, 17(1), 42-46.

Holt, L. L., Tierney, A. T., Guerra, G., Laffere, A., & Dick, F. (2018). Dimension-selective attention as a possible driver of dynamic, context-dependent re-weighting in speech processing. *Hearing research*, 366, 50-64.

Idemaru, K., & Holt, L. L. (2011). Word recognition reflects dimension-based statistical learning. *Journal of Experimental Psychology: Human Perception and Performance*, 37(6), 1939.

Idemaru, K., Holt, L. L., & Seltman, H. (2012). Individual differences in cue weights are stable across time: The case of Japanese stop lengths. *The Journal of the Acoustical Society of America*, 132(6), 3950-3964.

Idemaru, K., & Holt, L. L. (2014). Specificity of dimension-based statistical learning in word recognition. *Journal of Experimental Psychology: Human Perception and Performance*, 40(3), 1009.

Jasmin, K., Dick, F., Holt, L. L., & Tierney, A. (2020a). Tailored perception: Individuals' speech and music perception strategies fit their perceptual abilities. *Journal of Experimental Psychology: General*, 149(5), 914.

Jasmin, K., Dick, F., & Tierney, A. T. (2020b). The Multidimensional Battery of Prosody Perception (MBOPP). *Wellcome Open Research*, 5(4), 4.

Jasmin, K., Sun, H., & Tierney, A. T. (2020c). Effects of language experience on domain-general perceptual strategies. *Cognition*.

Jasmin, K., Dick, F., Stewart, L., & Tierney, A. T. (2020d). Altered functional connectivity during speech perception in congenital amusia. *Elife*, 9, e53539.

Kawahara, H., & Irino, T. (2005). Underlying principles of a high-quality speech manipulation system STRAIGHT and its application to speech segregation. In *Speech separation by humans and machines* (pp. 167-180). Springer, Boston, MA.

Kim, D., Clayards, M., & Kong, E. J. (2020). Individual differences in perceptual adaptation to unfamiliar phonetic categories. *Journal of Phonetics*, 81, 100984.

Kimball, AE & Cole, J. Perception and memory for within-category detail of phonemes and pitch accents. Preprint on ResearchGate DOI: 10.13140/RG.2.2.27341.79841

Kohler, K. J. (1987). Categorical pitch perception. In *Proceedings of the XIth International Congress of Phonetic Sciences* (Vol. 5, pp. 331-333). Tallinn: Academy of Sciences of the Estonian Soviet Socialist Republic.

Kurumada, C., Brown, M., Bibyk, S., Pontillo, D. F., & Tanenhaus, M. K. (2014). Is it or isn't it: Listeners make rapid use of prosody to infer speaker meanings. *Cognition*, 133(2), 335-342.

Kurumada, C., Brown, M., & Tanenhaus, M. K. (2018). Effects of distributional information on categorization of prosodic contours. *Psychonomic bulletin & review*, 25(3), 1153-1160.

Ladd, DR. (1996) *Intonational phonology*. Cambridge University Press.

Ladd, D. R., & Morton, R. (1997). The perception of intonational emphasis: continuous or categorical?. *Journal of phonetics*, 25(3), 313-342.

Lehet, M., & Holt, L. L. (2017). Dimension-based statistical learning affects both speech perception and production. *Cognitive science*, 41, 885-912.

Lisker, L. (1957). Closure duration and the intervocalic voiced-voiceless distinction in English. *Language*, 33(1), 42-49.

Lisker, L. (1986). "Voicing" in English: A catalogue of acoustic features signaling/b/versus/p/in trochees. *Language and speech*, 29(1), 3-11.

Liu, R., & Holt, L. L. (2015). Dimension-based statistical learning of vowels. *Journal of Experimental Psychology: Human Perception and Performance*, 41(6), 1783.

Liu, S., & Samuel, A. G. (2004). Perception of Mandarin lexical tones when F0 information is neutralized. *Language and speech*, 47(2), 109-138.

Nath, A. R., & Beauchamp, M. S. (2011). Dynamic changes in superior temporal sulcus connectivity during perception of noisy audiovisual speech. *Journal of Neuroscience*, 31(5), 1704-1714.

Peppé, S., Maxim, J., & Wells, B. (2000). Prosodic variation in southern British English. *Language and Speech*, 43(3), 309-334.

Pierrehumbert, J., & Hirschberg, J. B. (1990). The meaning of intonational contours in the interpretation of discourse.

Pierrehumbert, J. B., & Steele, S. A. (1989). Categories of tonal alignment in English. *Phonetica*, 46(4), 181-196.

Remijsen, B., & van Heuven, V. J. (1999). Gradient and categorical pitch dimensions in Dutch: diagnostic test. In *Proceedings of the 14th International Congress of Phonetic Sciences (Vol. 2, pp. 1865-1868)*.

Repp, B. H., & Lin, H. B. (1989). Acoustic properties and perception of stop consonant release transients. *The Journal of the Acoustical Society of America*, 85(1), 379-396.

Roettger T, Franke M (2019) Evidential strength of intonational cues and rational adaptation to (un-) reliable intonation. *Cognitive Science* 43, e12745.

Roettger, T. B., & Rimland, K. (2020). Listeners' adaptation to unreliable intonation is speaker-sensitive. *Cognition*, 204, 104372.

Rohe, T., & Noppeney, U. (2018). Reliability-weighted integration of audiovisual signals can be modulated by top-down attention. *eneuro*, 5(1).

Russell V. Lenth (2016). Least-Squares Means: The R Package lsmeans. *Journal of Statistical Software*, 69(1), 1-33.<doi:10.18637/jss.v069.i01>

Saindon, M. R., Trehub, S. E., Schellenberg, E. G., & van Lieshout, P. H. (2017). When is a Question a Question for Children and Adults?. *Language Learning and Development*, 13(3), 274-285.

Schertz, J., Cho, T., Lotto, A., & Warner, N. (2016). Individual differences in perceptual adaptability of foreign sound categories. *Attention, Perception, & Psychophysics*, 78(1), 355-367.



Saindon M, Cirelli L, Schellenberg E, van Lieshout P, Trehub S (2017) Children's and adults' perception of questions and statements from terminal fundamental frequency contours. *JASA* 141, 3123-3131.

Schneider, K., & Lintfert, B. (2003, August). Categorical perception of boundary tones in German. In *Proceedings of the 15th International Conference of the Phonetic Sciences* (pp. 631-634).

Streeter, L. A. (1978). Acoustic determinants of phrase boundary perception. *The Journal of the Acoustical Society of America*, 64(6), 1582-1592.

Toscano, J. C., & McMurray, B. (2010). Cue integration with categories: Weighting acoustic cues in speech using unsupervised learning and distributional statistics. *Cognitive science*, 34(3), 434-464.

Turk, A. E., & Sawusch, J. R. (1997). The domain of accentual lengthening in American English. *Journal of Phonetics*, 25(1), 25-41.

Turk, A. E., & White, L. (1999). Structural influences on accentual lengthening in English. *Journal of phonetics*, 27(2), 171-206.

Watson, D. G., Tanenhaus, M. K., & Gunlogson, C. A. (2008a). Interpreting pitch accents in online comprehension: H\* vs. L+ H. *Cognitive science*, 32(7), 1232-1244.

Watson, D. G., Arnold, J. E., & Tanenhaus, M. K. (2008b). Tic Tac TOE: Effects of predictability and importance on acoustic prominence in language production. *Cognition*, 106(3), 1548-1557.

Watson, D. G. (2010). The many roads to prominence: Understanding emphasis in conversation. In *Psychology of learning and motivation* (Vol. 52, pp. 163-183). Academic Press.

Whalen, D. H., & Xu, Y. (1992). Information for Mandarin tones in the amplitude contour and in brief segments. *Phonetica*, 49(1), 25-47.

Winn, M. B., Chatterjee, M., & Idsardi, W. J. (2013). Roles of voice onset time and F0 in stop consonant voicing perception: Effects of masking noise and low-pass filtering. *Journal of Speech, Language, and Hearing Research*.

Wu, Y., & Holt, L. L. (2018). Phonetic category activation drives dimension-based adaptive tuning in speech perception. In *CogSci*.

Wu, Y.C. (2020). Behavioral, computation, and electrophysiological investigations of adaptive plasticity mechanisms in speech perception. Doctoral Dissertation, Carnegie Mellon University. ProQuest Dissertations & Theses Global.

Wu, Y. C., & Holt, L. L. (under review). Category activation drives adaptive plasticity in dimension-based statistical learning in speech perception.

Xu, Y., & Xu, C. X. (2005). Phonetic realization of focus in English declarative intonation. *Journal of Phonetics*, 33(2), 159-197.

Yang, X., Shen, X., Li, W., & Yang, Y. (2014). How listeners weight acoustic cues to intonational phrase boundaries. *PloS one*, 9(7), e102166.

Zárate-Sánchez, G. (2016). Categorical perception and prenuclear pitch peak alignment in Spanish. *Proceedings of Speech Prosody 2016*, 663-667.

Zhang, X., & Holt, L. L. (2018). Simultaneous tracking of coevolving distributional regularities in speech. *Journal of Experimental Psychology: Human Perception and Performance*, 44(11), 1760.

Zhang, X., Wu, X., & Holt, L. L. (*in press*). The learning signal in perceptual tuning of speech: Bottom-up vs. Top-down information. *Cognitive Science*.

Zhang, H., Wiener, S., & Holt, L. L. (under review). Evidence for dynamic adjustment of cue weighting in speech.
